# Supplementary material for: Formulation optimization of Docetaxel loaded self-emulsifying drug delivery system to enhance bioavailability and anti-tumor activity
Source: PubMed Central journal article supplement (PMC4886259; doi:10.1038/srep26895), 2016-05-31
Supplement: srep26895-s1.pdf [file srep26895-s1.pdf]

**Supplementary file**

**Formulation optimization of Docetaxel loaded self-emulsifying drug delivery system to  
enhance bioavailability and anti-tumor activity**

Guru R. Valicherla<sup>1,5</sup>, Kandarp M. Dave<sup>2</sup>, Anees A. Syed<sup>1</sup>, Mohammed Riyazuddin<sup>1</sup>, Anand P.  
Gupta<sup>1</sup>, Akhilesh Singh<sup>3</sup>, Wahajuddin<sup>1,5</sup>, Kalyan Mitra<sup>4</sup>, Dipak Datta<sup>3</sup>, Jiaur R. Gayen<sup>1,5,\*</sup>

**Table S1: Mathematical equation of responses according to D- Optimal Mixture design.**

| Response     | Model  | R <sup>2</sup> | P value | F value | Reduced regression equation for the response                                                        |
|--------------|--------|----------------|---------|---------|-----------------------------------------------------------------------------------------------------|
| Solubility   | Linear | 0.7330         | 0.0005  | 11.50   | Solubility= 34.62 cap + 6.29 TPGS + 13.84 Gel + 98.51 Trans                                         |
| Droplet size | Linear | 0.7486         | 0.0088  | 6.46    | Droplet size=521.98 cap+ 128.54 TPGS - 55.91 Gel+ 334.27 Trans- 48.44 cap*TPGS-2910.49 cap*TPGS*Gel |

**Table S2: Robustness of droplet size after different dilutions. Values are presented as mean± standard deviation (n=3).**

| <b>Dilutions (fold)</b> | <b>Mean droplet size (nm) ± SD</b> |             |             |
|-------------------------|------------------------------------|-------------|-------------|
|                         | <b>F-1</b>                         | <b>F-2</b>  | <b>F-3</b>  |
| 200                     | 167.30±2.30                        | 178.20±1.90 | 162.60±5.60 |
| 400                     | 159.90±1.80                        | 172.30±3.20 | 160.30±3.20 |
| 600                     | 154.20±1.60                        | 170.40±4.30 | 159.30±4.10 |
| 800                     | 146.20±0.34                        | 167.40±1.40 | 154.20±1.30 |

**Table S3: Measurement of droplet size and drug content after 3 consecutive freeze thaw cycles. Values are presented as mean±standard deviation (n=3).**

| Cycles  | Droplet size (nm) |             |              | Drug content (%) |            |            |
|---------|-------------------|-------------|--------------|------------------|------------|------------|
|         | F-1               | F-2         | F-3          | F-1              | F-2        | F-3        |
| Initial | 167.30±5.42       | 177.10±2.18 | 204.60±3.71  | 100.00           | 100.00     | 100.00     |
| 1st     | 178.10±4.80       | 338.00±7.21 | 245.30±10.70 | 96.66±1.51       | 95.65±0.54 | 96.45±1.15 |
| 2nd     | 174.30±8.48       | 407.33±6.30 | 344.50±8.73  | 96.64±0.48       | 89.85±1.60 | 90.66±0.53 |
| 3rd     | 181.40±3.74       | 430.41±4.60 | 397.80±4.59  | 93.84±0.54       | 84.76±0.16 | 84.31±0.20 |
